# Supplementary material for: Microchamber Extraction and Analytical Pyrolysis to Explore Volatile Organic Compounds from Compression-Cooking Wood Materials Obtained under Different Conditions
Source: MDPI journal article supplement (doi:10.3390/molecules27238260), 2022-11-26
Supplement: s1 [file s1]

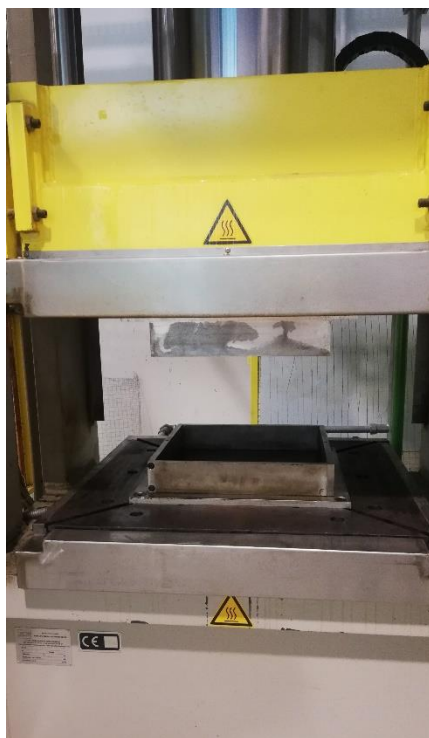

Figure S1. Hydraulic press used for this study.  
(Mold: 40 cm)

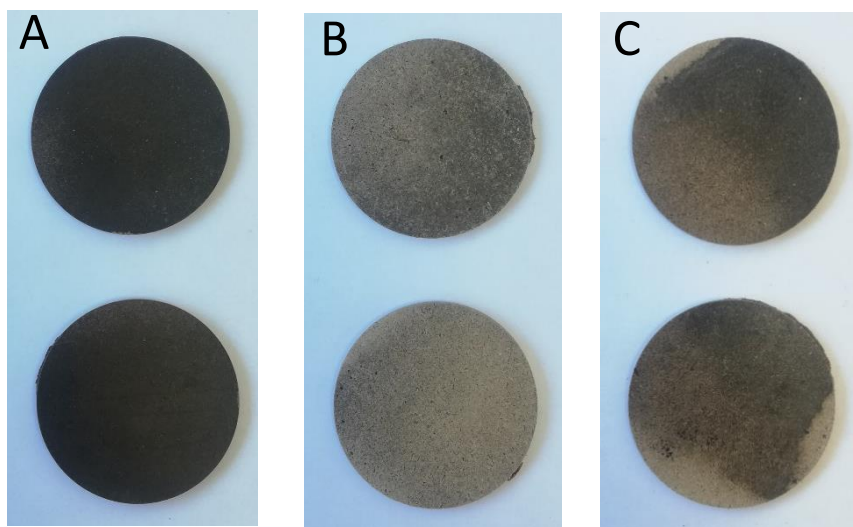

Figure S2. Photographs of manufactured boards.  
(Letters corresponding to the compression-cooking conditions from Table 1, diameter: 6.4 cm)

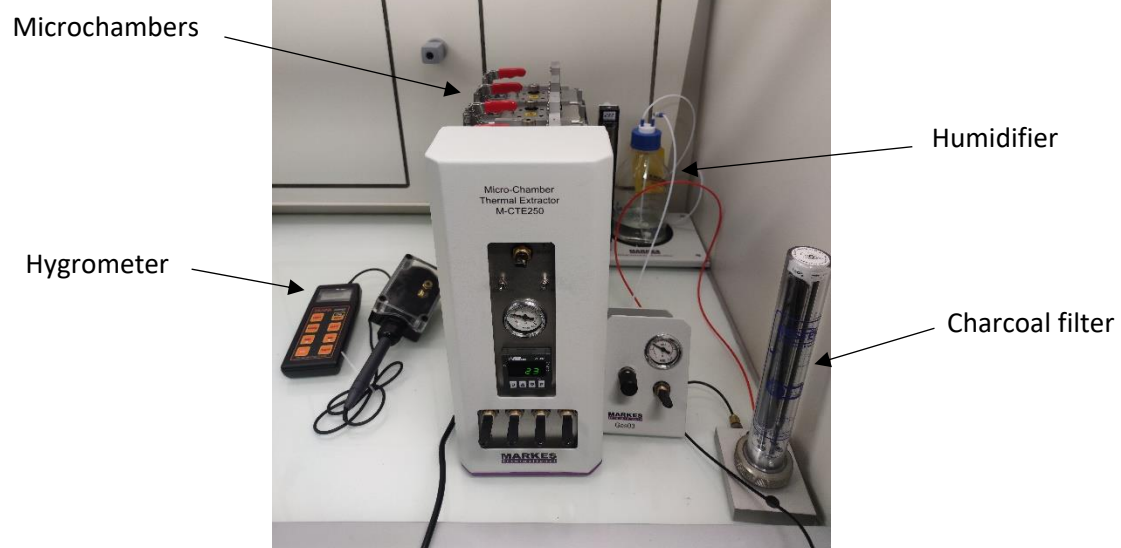

Figure S3. Microchamber system for VOC sampling.
